# Supplementary material for: Effects of boron nitride nanotube content on waterborne polyurethane–acrylate composite coating materials
Source: Royal Society of Chemistry journal article supplement (doi:10.1039/d1ra00873k), 2021-01-01
Supplement: d1ra00873k1.pdf [file d1ra00873k1.pdf]

## **Supplementary Information**

### **Effects of boron nitride nanotube content in waterborne polyurethane-acrylate composite coating materials**

Yong Joon Lee,<sup>a,‡</sup> Yunju La,<sup>a,‡</sup> Ok Sung Jeon,<sup>a,‡</sup> Hak Ji Lee,<sup>a</sup> Min Kyoon Shin,<sup>a</sup> Keun-Hyeok Yang,<sup>b</sup> Young Joon Yoo,<sup>a,\*</sup> Sang Yoon Park<sup>a,\*</sup>

<sup>a</sup>Center for Applied Electromagnetic Research (CAER), Advanced Institutes of Convergence Technology (AICT), Seoul National University, Suwon-si, Gyeonggi-do 16229, Republic of Korea.

<sup>b</sup>Department of Architectural Engineering, Kyonggi University, Suwon, Gyeonggi-Do 16227, Republic of Korea.

<sup>‡</sup> These authors contributed equally to this work.

Corresponding author e-mail: [youngjoonyoo@snu.ac.kr](mailto:youngjoonyoo@snu.ac.kr), [yoonpark77@snu.ac.kr](mailto:yoonpark77@snu.ac.kr)

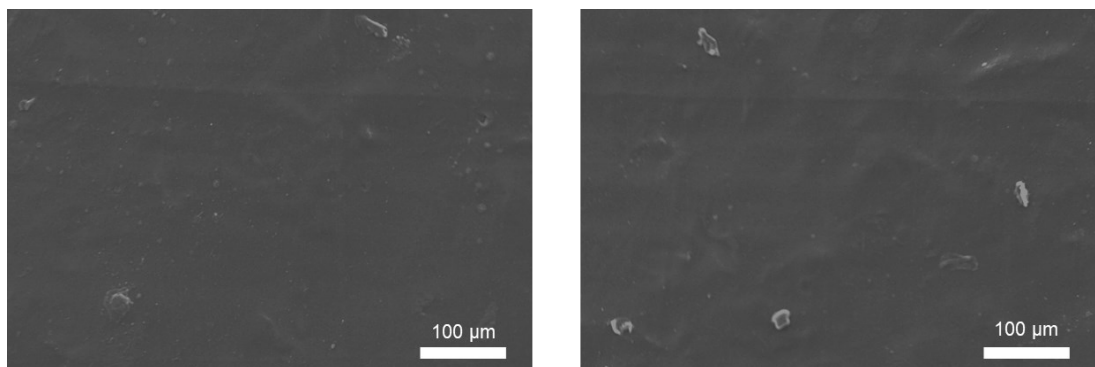

**Fig. S1.** SEM images of the bottom surface of the 2.5 wt% BNNT/WPUA composite film showing smooth surface without exposed fillers.

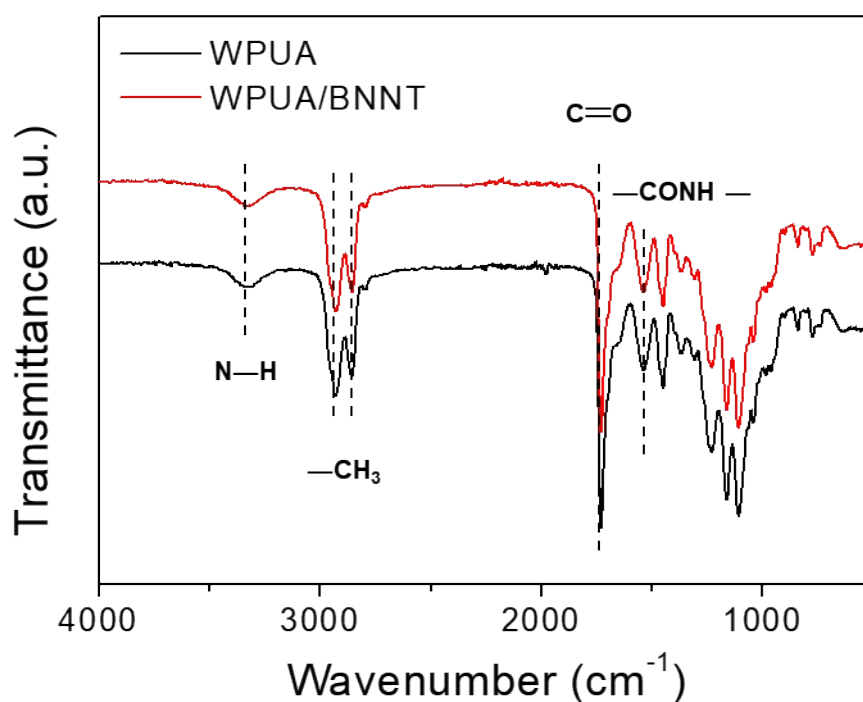

**Fig. S2.** FT-IR spectrum of the WPUA and WPUA/BNNT composite films. The broad absorption bands at  $1532\text{ cm}^{-1}$  could be associated with the stretching vibrations of the  $\text{—CONH—}$  group in the urethane segments. The bands at  $2930\text{ cm}^{-1}$  and  $2856\text{ cm}^{-1}$  exhibited  $\text{CH}_3$  peak and the band at  $1727\text{ cm}^{-1}$  was ascribed to carbonyl CO stretching vibration of acrylic ester groups in the WPUA spectrum. The B-N and B-N-B position could not specified at  $1390$  and  $813\text{ cm}^{-1}$ .

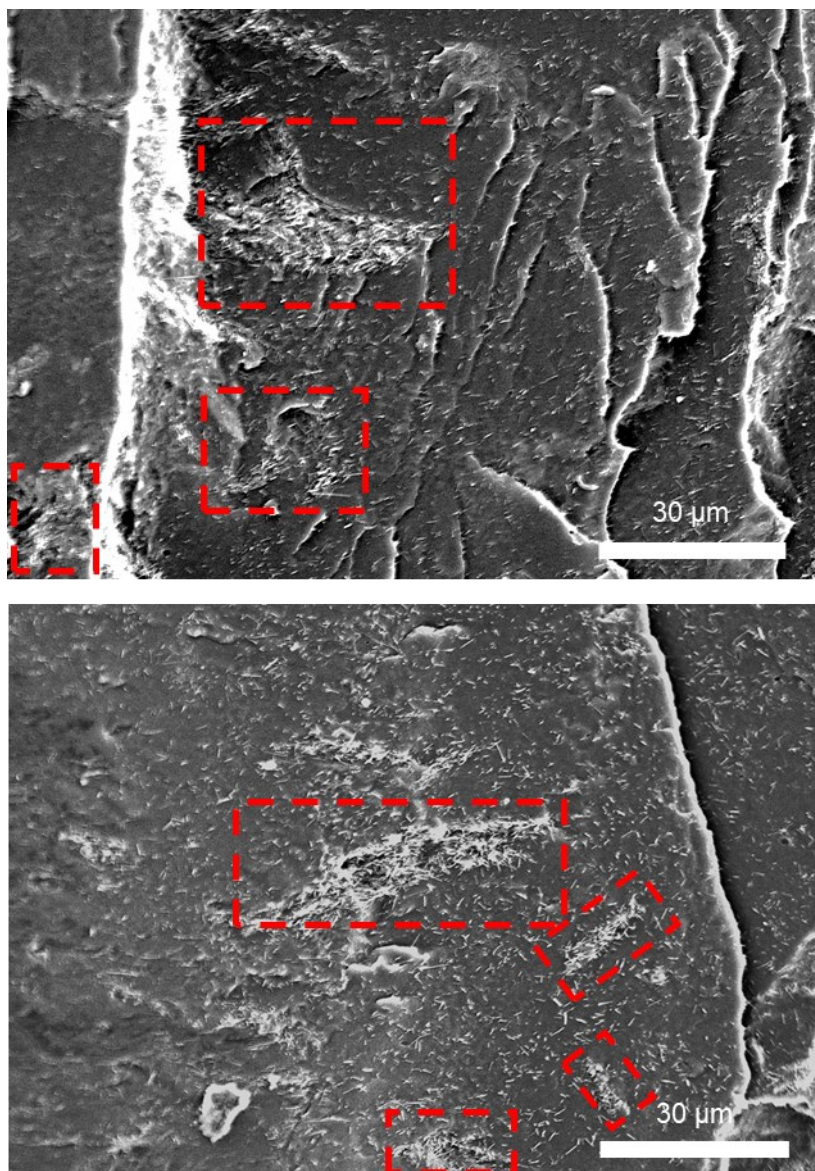

**Fig. S3.** Cross-sectional SEM images of the 5 wt% BNNT/WPUA composite film showed a large amount of phase-separated BNNT bundles in WPUA matrix.

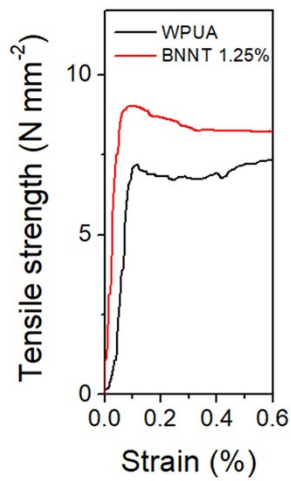

| Filler type | Yield stress (MPa) | Young's modulus (GPa) |
|-------------|--------------------|-----------------------|
| None        | 7.17               | 12.0                  |
| BNNT 1.25%  | 9.03               | 16.4                  |

**Fig. S4.** Stress-strain curve of WPUA and 1.25 wt% BNNT/WPUA composite showing elastic region and results of Yield stress and Yong's modulus.

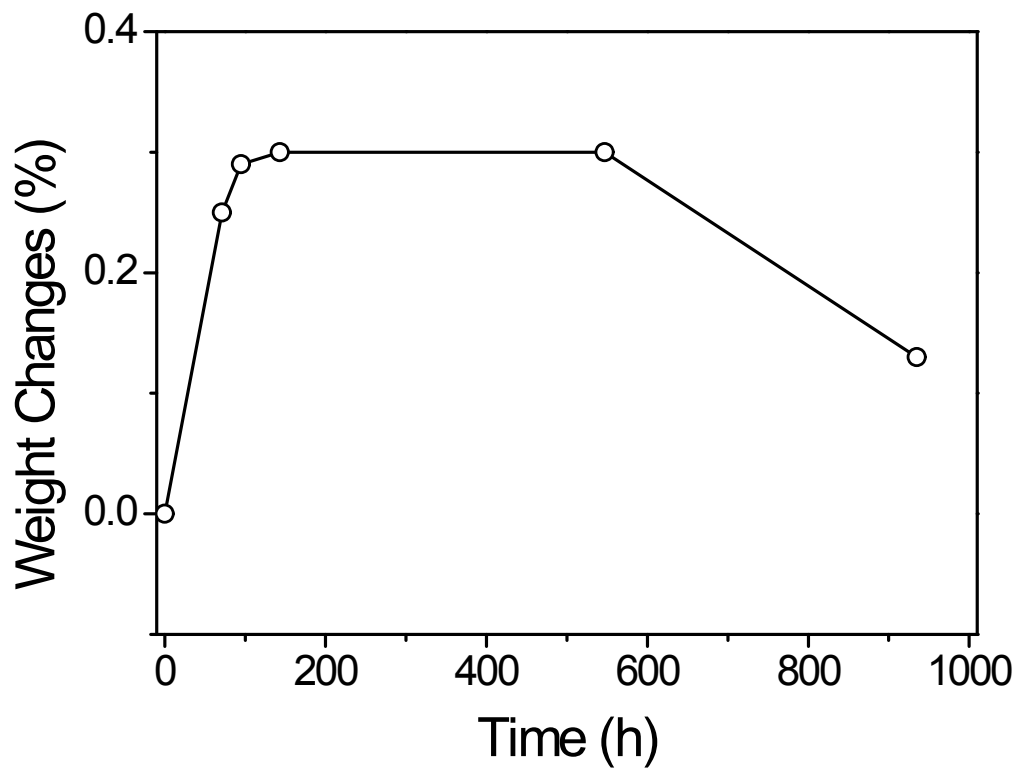

**Fig. S5.** Corrosion resistance of WPUA coated Zn plate immersed in 10 % hydrochloric acid solution.

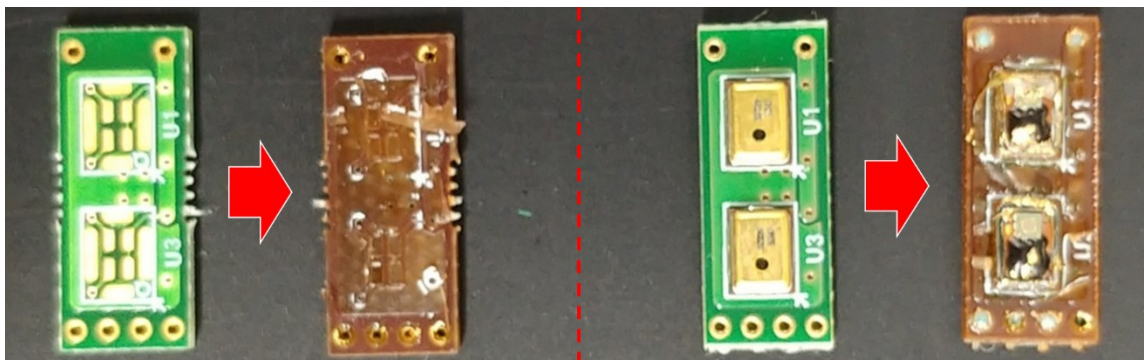

**Fig. S6.** Before and After photo images of the circuit board containing copper alloys without coating immersed in 65 vol% nitric acid solution after 10 minutes. Backside(left) and frontside(right)

**(a)**

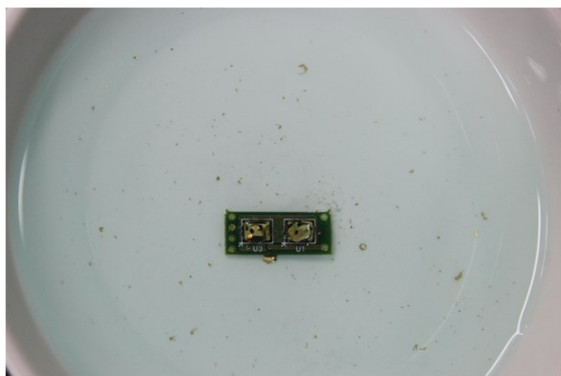

**(b)**

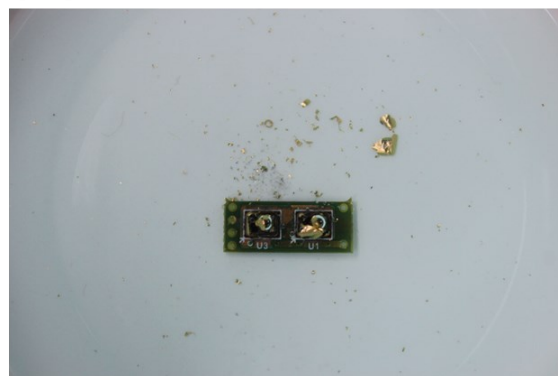

**Fig. S7.** Photo images of non-coating circuit board immersed in 30 vol% nitric acid solution. Fragmented copper alloy spread into the solution after 3 hours (a) and continued after 5 hours (b).
